# Supplementary material for: Early Detection of Wild Rocket Tracheofusariosis Using Hyperspectral Image-Based Machine Learning
Source: MDPI journal article supplement (doi:10.3390/rs14010084), 2021-12-24
Supplement: s1 [file s1]

**Table S2. Summary statistics of the Pairwise Permutational MANOVA. The different DSC classes combinations are compared taking into account the contributing effect of the three temporal intervals since the infection (DPI 5, 10 and 15 days), and of the Pots' identity, separately**

**DSC 0 VS. DSC 3 ACCOUNTING FOR  
DPI 5**

|                     | Df | SumOfSqs | R2       | F         | Pr(>F)  |
|---------------------|----|----------|----------|-----------|---------|
| <b>MIN.</b>         | 1  | 1.51E+26 | 0.000236 | 0.1889989 | 0.013   |
| <b>1ST QUARTILE</b> | 1  | 3.96E+26 | 0.000465 | 0.3797729 | 0.25875 |
| <b>MEDIAN</b>       | 1  | 5.87E+26 | 0.000632 | 0.5294736 | 0.5215  |
| <b>MEAN</b>         | 1  | 8.45E+26 | 0.001195 | 0.7941406 | 0.52272 |
| <b>3RD QUARTILE</b> | 1  | 9.56E+26 | 0.001093 | 0.8868437 | 0.788   |
| <b>MAX.</b>         | 1  | 4.26E+27 | 0.008185 | 4.7982248 | 1       |

**DSC 0 VS. DSC 3 ACCOUNTING FOR  
DPI 10**

|                     | Df   | SumOfSqs | R2       | F        | Pr(>F)  |
|---------------------|------|----------|----------|----------|---------|
| <b>MIN.</b>         | 1    | 4.95E+12 | 1.65E-17 | 1.80E-15 | 0.021   |
| <b>1ST QUARTILE</b> | 2    | 1.20E+27 | 1.51E-03 | 6.29E-01 | 0.22975 |
| <b>MEDIAN</b>       | 2    | 2.00E+27 | 2.20E-03 | 8.89E-01 | 0.4825  |
| <b>MEAN</b>         | 1.98 | 2.11E+27 | 2.79E-03 | 1.01E+00 | 0.49097 |
| <b>3RD QUARTILE</b> | 2    | 2.55E+27 | 3.17E-03 | 1.30E+00 | 0.738   |
| <b>MAX.</b>         | 2    | 5.38E+27 | 3.28E-02 | 3.46E+00 | 1       |

**DSC 0 VS. DSC 3 ACCOUNTING FOR  
DPI 15**

|                     | Df    | SumOfSqs | R2       | F         | Pr(>F)  |
|---------------------|-------|----------|----------|-----------|---------|
| <b>MIN.</b>         | 9     | 2.66E+27 | 0.013185 | 0.4727881 | 0.021   |
| <b>1ST QUARTILE</b> | 19    | 1.64E+28 | 0.019806 | 0.692874  | 0.25325 |
| <b>MEDIAN</b>       | 23.5  | 2.00E+28 | 0.023092 | 0.8432101 | 0.471   |
| <b>MEAN</b>         | 23.36 | 2.37E+28 | 0.029893 | 0.9598512 | 0.48957 |
| <b>3RD QUARTILE</b> | 28    | 2.73E+28 | 0.031637 | 1.065448  | 0.72325 |
| <b>MAX.</b>         | 29    | 8.18E+28 | 0.146095 | 3.2138584 | 0.997   |

**DSC 0 VS. DSC 3 ACCOUNTING FOR POTS IDENTIFICATION  
NUMBER**

|                     | Df     | SumOfSqs | R2       |
|---------------------|--------|----------|----------|
| <b>MIN.</b>         | 117    | 3.56E+28 | 0.846229 |
| <b>1ST QUARTILE</b> | 783.5  | 7.26E+29 | 0.964456 |
| <b>MEDIAN</b>       | 806    | 8.96E+29 | 0.973542 |
| <b>MEAN</b>         | 773.41 | 8.34E+29 | 0.966126 |
| <b>3RD QUARTILE</b> | 827    | 1.01E+30 | 0.977389 |
| <b>MAX.</b>         | 856    | 1.04E+30 | 0.981597 |

| DSC 0 VS. DSC 1 ACCOUNTING FOR DPI 5 |    |          |          |           |         |
|--------------------------------------|----|----------|----------|-----------|---------|
|                                      | Df | SumOfSqs | R2       | F         | Pr(>F)  |
| MIN.                                 | 1  | 1.51E+26 | 0.000236 | 0.1889989 | 0.013   |
| 1ST QUARTILE                         | 1  | 3.96E+26 | 0.000465 | 0.3797729 | 0.25875 |
| MEDIAN                               | 1  | 5.87E+26 | 0.000632 | 0.5294736 | 0.5215  |
| MEAN                                 | 1  | 8.45E+26 | 0.001195 | 0.7941406 | 0.52272 |
| 3RD QUARTILE                         | 1  | 9.56E+26 | 0.001093 | 0.8868437 | 0.788   |
| MAX.                                 | 1  | 4.26E+27 | 0.008185 | 4.7982248 | 1       |

| DSC 0 VS. DSC 1 ACCOUNTING FOR DPI 10 |      |          |          |          |         |
|---------------------------------------|------|----------|----------|----------|---------|
|                                       | Df   | SumOfSqs | R2       | F        | Pr(>F)  |
| MIN.                                  | 1    | 4.95E+12 | 1.65E-17 | 1.80E-15 | 0.021   |
| 1ST QUARTILE                          | 2    | 1.20E+27 | 1.51E-03 | 6.29E-01 | 0.22975 |
| MEDIAN                                | 2    | 2.00E+27 | 2.20E-03 | 8.89E-01 | 0.4825  |
| MEAN                                  | 1.98 | 2.11E+27 | 2.79E-03 | 1.01E+00 | 0.49097 |
| 3RD QUARTILE                          | 2    | 2.55E+27 | 3.17E-03 | 1.30E+00 | 0.738   |
| MAX.                                  | 2    | 5.38E+27 | 3.28E-02 | 3.46E+00 | 1       |

| DSC 0 VS. DSC 1 ACCOUNTING FOR DPI 15 |       |          |          |           |         |
|---------------------------------------|-------|----------|----------|-----------|---------|
|                                       | Df    | SumOfSqs | R2       | F         | Pr(>F)  |
| MIN.                                  | 9     | 2.66E+27 | 0.013185 | 0.4727881 | 0.021   |
| 1ST QUARTILE                          | 19    | 1.64E+28 | 0.019806 | 0.692874  | 0.25325 |
| MEDIAN                                | 23.5  | 2.00E+28 | 0.023092 | 0.8432101 | 0.471   |
| MEAN                                  | 23.36 | 2.37E+28 | 0.029893 | 0.9598512 | 0.48957 |
| 3RD QUARTILE                          | 28    | 2.73E+28 | 0.031637 | 1.065448  | 0.72325 |
| MAX.                                  | 29    | 8.18E+28 | 0.146095 | 3.2138584 | 0.997   |

| DSC 0 VS. DSC 1 ACCOUNTING FOR POTS IDENTIFICATION NUMBER |        |          |          |
|-----------------------------------------------------------|--------|----------|----------|
|                                                           | Df     | SumOfSqs | R2       |
| MIN.                                                      | 117    | 3.56E+28 | 0.846229 |
| 1ST QUARTILE                                              | 783.5  | 7.26E+29 | 0.964456 |
| MEDIAN                                                    | 806    | 8.96E+29 | 0.973542 |
| MEAN                                                      | 773.41 | 8.34E+29 | 0.966126 |
| 3RD QUARTILE                                              | 827    | 1.01E+30 | 0.977389 |
| MAX.                                                      | 856    | 1.04E+30 | 0.981597 |

| DSC 0 VS. DSC 2 ACCOUNTING FOR DPI 5 |  |  |
|--------------------------------------|--|--|
|--------------------------------------|--|--|

|              | Df | SumOfSqs | R2       | F         | Pr(>F)  |
|--------------|----|----------|----------|-----------|---------|
| MIN.         | 1  | 1.51E+26 | 0.000236 | 0.1889989 | 0.013   |
| 1ST QUARTILE | 1  | 3.96E+26 | 0.000465 | 0.3797729 | 0.25875 |
| MEDIAN       | 1  | 5.87E+26 | 0.000632 | 0.5294736 | 0.5215  |
| MEAN         | 1  | 8.45E+26 | 0.001195 | 0.7941406 | 0.52272 |
| 3RD QUARTILE | 1  | 9.56E+26 | 0.001093 | 0.8868437 | 0.788   |
| MAX.         | 1  | 4.26E+27 | 0.008185 | 4.7982248 | 1       |

#### DSC 0 VS. DSC 2 ACCOUNTING FOR DPI 10

|              | Df   | SumOfSqs | R2       | F        | Pr(>F)  |
|--------------|------|----------|----------|----------|---------|
| MIN.         | 1    | 4.95E+12 | 1.65E-17 | 1.80E-15 | 0.021   |
| 1ST QUARTILE | 2    | 1.20E+27 | 1.51E-03 | 6.29E-01 | 0.22975 |
| MEDIAN       | 2    | 2.00E+27 | 2.20E-03 | 8.89E-01 | 0.4825  |
| MEAN         | 1.98 | 2.11E+27 | 2.79E-03 | 1.01E+00 | 0.49097 |
| 3RD QUARTILE | 2    | 2.55E+27 | 3.17E-03 | 1.30E+00 | 0.738   |
| MAX.         | 2    | 5.38E+27 | 3.28E-02 | 3.46E+00 | 1       |

#### DSC 0 VS. DSC 2 ACCOUNTING FOR DPI 15

|              | Df    | SumOfSqs | R2       | F         | Pr(>F)  |
|--------------|-------|----------|----------|-----------|---------|
| MIN.         | 9     | 2.66E+27 | 0.013185 | 0.4727881 | 0.021   |
| 1ST QUARTILE | 19    | 1.64E+28 | 0.019806 | 0.692874  | 0.25325 |
| MEDIAN       | 23.5  | 2.00E+28 | 0.023092 | 0.8432101 | 0.471   |
| MEAN         | 23.36 | 2.37E+28 | 0.029893 | 0.9598512 | 0.48957 |
| 3RD QUARTILE | 28    | 2.73E+28 | 0.031637 | 1.065448  | 0.72325 |
| MAX.         | 29    | 8.18E+28 | 0.146095 | 3.2138584 | 0.997   |

#### DSC 0 VS. DSC 2 ACCOUNTING FOR POTS IDENTIFICATION NUMBER

|              | Df     | SumOfSqs | R2       |
|--------------|--------|----------|----------|
| MIN.         | 117    | 3.56E+28 | 0.846229 |
| 1ST QUARTILE | 783.5  | 7.26E+29 | 0.964456 |
| MEDIAN       | 806    | 8.96E+29 | 0.973542 |
| MEAN         | 773.41 | 8.34E+29 | 0.966126 |
| 3RD QUARTILE | 827    | 1.01E+30 | 0.977389 |
| MAX.         | 856    | 1.04E+30 | 0.981597 |

#### DSC 3 VS. DSC 1 ACCOUNTING FOR DPI 5

|              | Df | SumOfSqs | R2       | F         | Pr(>F)  |
|--------------|----|----------|----------|-----------|---------|
| MIN.         | 1  | 1.51E+26 | 0.000236 | 0.1889989 | 0.013   |
| 1ST QUARTILE | 1  | 3.96E+26 | 0.000465 | 0.3797729 | 0.25875 |

|                     |   |          |          |           |         |
|---------------------|---|----------|----------|-----------|---------|
| <b>MEDIAN</b>       | 1 | 5.87E+26 | 0.000632 | 0.5294736 | 0.5215  |
| <b>MEAN</b>         | 1 | 8.45E+26 | 0.001195 | 0.7941406 | 0.52272 |
| <b>3RD QUARTILE</b> | 1 | 9.56E+26 | 0.001093 | 0.8868437 | 0.788   |
| <b>MAX.</b>         | 1 | 4.26E+27 | 0.008185 | 4.7982248 | 1       |

#### DSC 3 VS. DSC 1 ACCOUNTING FOR DPI 10

|                     | Df   | SumOfSqs | R2       | F        | Pr(>F)  |
|---------------------|------|----------|----------|----------|---------|
| <b>MIN.</b>         | 1    | 4.95E+12 | 1.65E-17 | 1.80E-15 | 0.021   |
| <b>1ST QUARTILE</b> | 2    | 1.20E+27 | 1.51E-03 | 6.29E-01 | 0.22975 |
| <b>MEDIAN</b>       | 2    | 2.00E+27 | 2.20E-03 | 8.89E-01 | 0.4825  |
| <b>MEAN</b>         | 1.98 | 2.11E+27 | 2.79E-03 | 1.01E+00 | 0.49097 |
| <b>3RD QUARTILE</b> | 2    | 2.55E+27 | 3.17E-03 | 1.30E+00 | 0.738   |
| <b>MAX.</b>         | 2    | 5.38E+27 | 3.28E-02 | 3.46E+00 | 1       |

#### DSC 3 VS. DSC 1 ACCOUNTING FOR DPI 15

|                     | Df    | SumOfSqs | R2       | F         | Pr(>F)  |
|---------------------|-------|----------|----------|-----------|---------|
| <b>MIN.</b>         | 9     | 2.66E+27 | 0.013185 | 0.4727881 | 0.021   |
| <b>1ST QUARTILE</b> | 19    | 1.64E+28 | 0.019806 | 0.692874  | 0.25325 |
| <b>MEDIAN</b>       | 23.5  | 2.00E+28 | 0.023092 | 0.8432101 | 0.471   |
| <b>MEAN</b>         | 23.36 | 2.37E+28 | 0.029893 | 0.9598512 | 0.48957 |
| <b>3RD QUARTILE</b> | 28    | 2.73E+28 | 0.031637 | 1.065448  | 0.72325 |
| <b>MAX.</b>         | 29    | 8.18E+28 | 0.146095 | 3.2138584 | 0.997   |

#### DSC 3 VS. DSC 1 ACCOUNTING FOR POTS IDENTIFICATION NUMBER

|                     | Df     | SumOfSqs | R2       |
|---------------------|--------|----------|----------|
| <b>MIN.</b>         | 117    | 3.56E+28 | 0.846229 |
| <b>1ST QUARTILE</b> | 783.5  | 7.26E+29 | 0.964456 |
| <b>MEDIAN</b>       | 806    | 8.96E+29 | 0.973542 |
| <b>MEAN</b>         | 773.41 | 8.34E+29 | 0.966126 |
| <b>3RD QUARTILE</b> | 827    | 1.01E+30 | 0.977389 |
| <b>MAX.</b>         | 856    | 1.04E+30 | 0.981597 |

#### DSC 3 VS. DSC 2 ACCOUNTING FOR DPI 5

|                     | Df | SumOfSqs | R2       | F         | Pr(>F)  |
|---------------------|----|----------|----------|-----------|---------|
| <b>MIN.</b>         | 1  | 1.51E+26 | 0.000236 | 0.1889989 | 0.013   |
| <b>1ST QUARTILE</b> | 1  | 3.96E+26 | 0.000465 | 0.3797729 | 0.25875 |
| <b>MEDIAN</b>       | 1  | 5.87E+26 | 0.000632 | 0.5294736 | 0.5215  |
| <b>MEAN</b>         | 1  | 8.45E+26 | 0.001195 | 0.7941406 | 0.52272 |

|                     |   |          |          |           |       |
|---------------------|---|----------|----------|-----------|-------|
| <b>3RD QUARTILE</b> | 1 | 9.56E+26 | 0.001093 | 0.8868437 | 0.788 |
| <b>MAX.</b>         | 1 | 4.26E+27 | 0.008185 | 4.7982248 | 1     |

#### DSC 3 VS. DSC 2 ACCOUNTING FOR DPI 10

|                     | Df   | SumOfSqs | R2       | F        | Pr(>F)  |
|---------------------|------|----------|----------|----------|---------|
| <b>MIN.</b>         | 1    | 4.95E+12 | 1.65E-17 | 1.80E-15 | 0.021   |
| <b>1ST QUARTILE</b> | 2    | 1.20E+27 | 1.51E-03 | 6.29E-01 | 0.22975 |
| <b>MEDIAN</b>       | 2    | 2.00E+27 | 2.20E-03 | 8.89E-01 | 0.4825  |
| <b>MEAN</b>         | 1.98 | 2.11E+27 | 2.79E-03 | 1.01E+00 | 0.49097 |
| <b>3RD QUARTILE</b> | 2    | 2.55E+27 | 3.17E-03 | 1.30E+00 | 0.738   |
| <b>MAX.</b>         | 2    | 5.38E+27 | 3.28E-02 | 3.46E+00 | 1       |

#### DSC 3 VS. DSC 2 ACCOUNTING FOR DPI 15

|                     | Df    | SumOfSqs | R2       | F         | Pr(>F)  |
|---------------------|-------|----------|----------|-----------|---------|
| <b>MIN.</b>         | 9     | 2.66E+27 | 0.013185 | 0.4727881 | 0.021   |
| <b>1ST QUARTILE</b> | 19    | 1.64E+28 | 0.019806 | 0.692874  | 0.25325 |
| <b>MEDIAN</b>       | 23.5  | 2.00E+28 | 0.023092 | 0.8432101 | 0.471   |
| <b>MEAN</b>         | 23.36 | 2.37E+28 | 0.029893 | 0.9598512 | 0.48957 |
| <b>3RD QUARTILE</b> | 28    | 2.73E+28 | 0.031637 | 1.065448  | 0.72325 |
| <b>MAX.</b>         | 29    | 8.18E+28 | 0.146095 | 3.2138584 | 0.997   |

#### DSC 3 VS. DSC 2 ACCOUNTING FOR POTS IDENTIFICATION NUMBER

|                     | Df     | SumOfSqs | R2       |
|---------------------|--------|----------|----------|
| <b>MIN.</b>         | 117    | 3.56E+28 | 0.846229 |
| <b>1ST QUARTILE</b> | 783.5  | 7.26E+29 | 0.964456 |
| <b>MEDIAN</b>       | 806    | 8.96E+29 | 0.973542 |
| <b>MEAN</b>         | 773.41 | 8.34E+29 | 0.966126 |
| <b>3RD QUARTILE</b> | 827    | 1.01E+30 | 0.977389 |
| <b>MAX.</b>         | 856    | 1.04E+30 | 0.981597 |

#### DSC 1 VS. DSC 2 ACCOUNTING FOR DPI 5

|                     | Df | SumOfSqs | R2       | F         | Pr(>F)  |
|---------------------|----|----------|----------|-----------|---------|
| <b>MIN.</b>         | 1  | 1.51E+26 | 0.000236 | 0.1889989 | 0.013   |
| <b>1ST QUARTILE</b> | 1  | 3.96E+26 | 0.000465 | 0.3797729 | 0.25875 |
| <b>MEDIAN</b>       | 1  | 5.87E+26 | 0.000632 | 0.5294736 | 0.5215  |
| <b>MEAN</b>         | 1  | 8.45E+26 | 0.001195 | 0.7941406 | 0.52272 |
| <b>3RD QUARTILE</b> | 1  | 9.56E+26 | 0.001093 | 0.8868437 | 0.788   |
| <b>MAX.</b>         | 1  | 4.26E+27 | 0.008185 | 4.7982248 | 1       |

| DSC 1 VS. DSC 2 ACCOUNTING FOR DPI 10 |      |          |          |          |         |
|---------------------------------------|------|----------|----------|----------|---------|
|                                       | Df   | SumOfSqs | R2       | F        | Pr(>F)  |
| MIN.                                  | 1    | 4.95E+12 | 1.65E-17 | 1.80E-15 | 0.021   |
| 1ST QUARTILE                          | 2    | 1.20E+27 | 1.51E-03 | 6.29E-01 | 0.22975 |
| MEDIAN                                | 2    | 2.00E+27 | 2.20E-03 | 8.89E-01 | 0.4825  |
| MEAN                                  | 1.98 | 2.11E+27 | 2.79E-03 | 1.01E+00 | 0.49097 |
| 3RD QUARTILE                          | 2    | 2.55E+27 | 3.17E-03 | 1.30E+00 | 0.738   |
| MAX.                                  | 2    | 5.38E+27 | 3.28E-02 | 3.46E+00 | 1       |

| DSC 1 VS. DSC 2 ACCOUNTING FOR DPI 15 |       |          |          |           |         |
|---------------------------------------|-------|----------|----------|-----------|---------|
|                                       | Df    | SumOfSqs | R2       | F         | Pr(>F)  |
| MIN.                                  | 9     | 2.66E+27 | 0.013185 | 0.4727881 | 0.021   |
| 1ST QUARTILE                          | 19    | 1.64E+28 | 0.019806 | 0.692874  | 0.25325 |
| MEDIAN                                | 23.5  | 2.00E+28 | 0.023092 | 0.8432101 | 0.471   |
| MEAN                                  | 23.36 | 2.37E+28 | 0.029893 | 0.9598512 | 0.48957 |
| 3RD QUARTILE                          | 28    | 2.73E+28 | 0.031637 | 1.065448  | 0.72325 |
| MAX.                                  | 29    | 8.18E+28 | 0.146095 | 3.2138584 | 0.997   |

| DSC 1 VS. DSC 2 ACCOUNTING FOR POTS IDENTIFICATION NUMBER |        |          |          |
|-----------------------------------------------------------|--------|----------|----------|
|                                                           | Df     | SumOfSqs | R2       |
| MIN.                                                      | 117    | 3.56E+28 | 0.846229 |
| 1ST QUARTILE                                              | 783.5  | 7.26E+29 | 0.964456 |
| MEDIAN                                                    | 806    | 8.96E+29 | 0.973542 |
| MEAN                                                      | 773.41 | 8.34E+29 | 0.966126 |
| 3RD QUARTILE                                              | 827    | 1.01E+30 | 0.977389 |
| MAX.                                                      | 856    | 1.04E+30 | 0.981597 |
