# Supplementary material for: Early Detection of Wild Rocket Tracheofusariosis Using Hyperspectral Image-Based Machine Learning
Source: MDPI journal article supplement (doi:10.3390/rs14010084), 2021-12-24
Supplement: s1 [file s1]

**Table S3. Summary statistics of the evaluation metrics of the cross-pots prediction under the indicator strategy not reported in the main manuscript. The metrics are reported for the complete testing dataset and for the partial datasets considering the days after the infection (dpi) separately. Metrics are reported for both the pixel and whole individual level of prediction.**

**EVALUATION METRICS OF THE TESTING DATASET**

| TESTING WITH THE COMPLETE DATASET WITH THE INDICATOR STRATEGY |           |         |          |
|---------------------------------------------------------------|-----------|---------|----------|
| <b>HEALTHY</b>                                                |           |         |          |
|                                                               | Precision | Recall  | F1 Score |
| <b>MIN.</b>                                                   | 0.19555   | 0.36222 | 0.25399  |
| <b>MEDIAN</b>                                                 | 0.84469   | 0.91341 | 0.87561  |
| <b>MEAN</b>                                                   | 0.78388   | 0.87919 | 0.82271  |
| <b>MAX.</b>                                                   | 0.93264   | 0.99570 | 0.93105  |
| <b>INFECTED</b>                                               |           |         |          |
|                                                               | Precision | Recall  | F1 Score |
| <b>MIN.</b>                                                   | 0.52105   | 0.25208 | 0.36228  |
| <b>MEDIAN</b>                                                 | 0.74122   | 0.58071 | 0.63252  |
| <b>MEAN</b>                                                   | 0.72880   | 0.56872 | 0.62908  |
| <b>MAX.</b>                                                   | 0.97489   | 0.82436 | 0.83576  |
| <b>PARTIAL TESTING WITH THE INDICATOR STRATEGY</b>            |           |         |          |
| <b>dpi 5</b>                                                  |           |         |          |
| <b>HEALTHY</b>                                                |           |         |          |
|                                                               | Precision | Recall  | F1 Score |
| <b>MIN.</b>                                                   | 0.31926   | 0.29167 | 0.33994  |
| <b>MEDIAN</b>                                                 | 0.60155   | 0.89320 | 0.69416  |
| <b>MEAN</b>                                                   | 0.65523   | 0.85210 | 0.72821  |
| <b>MAX.</b>                                                   | 1.00000   | 0.99800 | 0.95566  |
| <b>INFECTED</b>                                               |           |         |          |
|                                                               | Precision | Recall  | F1 Score |
| <b>MIN.</b>                                                   | 0.20627   | 0.05594 | 0.09527  |
| <b>MEDIAN</b>                                                 | 0.76967   | 0.40463 | 0.52717  |
| <b>MEAN</b>                                                   | 0.75005   | 0.42710 | 0.51177  |
| <b>MAX.</b>                                                   | 0.97403   | 1.00000 | 0.94444  |
| <b>dpi 10</b>                                                 |           |         |          |
| <b>HEALTHY</b>                                                |           |         |          |
|                                                               | Precision | Recall  | F1 Score |
| <b>MIN.</b>                                                   | 0.18577   | 0.40967 | 0.26576  |
| <b>MEDIAN</b>                                                 | 0.62916   | 0.91022 | 0.75872  |

|                                                               |           |         |          |
|---------------------------------------------------------------|-----------|---------|----------|
| MEAN                                                          | 0.60073   | 0.87697 | 0.70276  |
| MAX.                                                          | 0.94367   | 1.00000 | 0.92809  |
|                                                               |           |         |          |
| INFECTED                                                      |           |         |          |
|                                                               | Precision | Recall  | F1 Score |
| MIN.                                                          | 0.54613   | 0.16031 | 0.26981  |
| MEDIAN                                                        | 0.84274   | 0.41973 | 0.54255  |
| MEAN                                                          | 0.81512   | 0.43644 | 0.55536  |
| MAX.                                                          | 1.00000   | 0.88028 | 0.86110  |
|                                                               |           |         |          |
| dpi 15                                                        |           |         |          |
| HEALTHY                                                       |           |         |          |
|                                                               | Precision | Recall  | F1 Score |
| MIN.                                                          | 0.45340   | 0.72640 | 0.61230  |
| MEDIAN                                                        | 0.87043   | 0.97200 | 0.90787  |
| MEAN                                                          | 0.84937   | 0.95030 | 0.89101  |
| MAX.                                                          | 1.00000   | 1.00000 | 0.98363  |
|                                                               |           |         |          |
| INFECTED                                                      |           |         |          |
|                                                               | Precision | Recall  | F1 Score |
| MIN.                                                          | 0.53606   | 0.30203 | 0.44821  |
| MEDIAN                                                        | 0.92857   | 0.75349 | 0.81423  |
| MEAN                                                          | 0.89065   | 0.72707 | 0.78437  |
| MAX.                                                          | 1.00000   | 1.00000 | 0.96444  |
|                                                               |           |         |          |
| WHOLE INDIVIDUAL PLANTS                                       |           |         |          |
| TESTING WITH THE COMPLETE DATASET WITH THE INDICATOR STRATEGY |           |         |          |
| HEALTHY                                                       |           |         |          |
|                                                               | Precision | Recall  | F1 Score |
| MIN.                                                          | 0.25397   | 0.35556 | 0.29630  |
| MEDIAN                                                        | 0.77276   | 0.93333 | 0.84615  |
| MEAN                                                          | 0.75051   | 0.89600 | 0.81278  |
| MAX.                                                          | 0.91111   | 1.00000 | 0.91667  |
|                                                               |           |         |          |
| INFECTED                                                      |           |         |          |
|                                                               | Precision | Recall  | F1 Score |
| MIN.                                                          | 0.58696   | 0.34286 | 0.47059  |
| MEDIAN                                                        | 0.88348   | 0.66667 | 0.75472  |
| MEAN                                                          | 0.87479   | 0.65877 | 0.74398  |
| MAX.                                                          | 1.00000   | 0.88235 | 0.89474  |
|                                                               |           |         |          |

| PARTIAL TESTING WITH THE INDICATOR STRATEGY |  |           |         |          |
|---------------------------------------------|--|-----------|---------|----------|
|                                             |  | dpi 5     |         |          |
| HEALTHY                                     |  |           |         |          |
|                                             |  | Precision | Recall  | F1 Score |
| MIN.                                        |  | 0.33333   | 0.25000 | 0.33333  |
| MEDIAN                                      |  | 0.62019   | 1.00000 | 0.71795  |
| MEAN                                        |  | 0.63976   | 0.88210 | 0.71814  |
| MAX.                                        |  | 1.00000   | 1.00000 | 1.00000  |
| INFECTED                                    |  |           |         |          |
|                                             |  | Precision | Recall  | F1 Score |
| MIN.                                        |  | 0.54167   | 0.08696 | 0.15385  |
| MEDIAN                                      |  | 0.95000   | 0.56522 | 0.68966  |
| MEAN                                        |  | 0.88910   | 0.56701 | 0.65068  |
| MAX.                                        |  | 1.00000   | 1.00000 | 1.00000  |
|                                             |  |           |         |          |
|                                             |  | dpi 10    |         |          |
| HEALTHY                                     |  |           |         |          |
|                                             |  | Precision | Recall  | F1 Score |
| MIN.                                        |  | 0.10000   | 0.07143 | 0.08333  |
| MEDIAN                                      |  | 0.58824   | 0.93333 | 0.69091  |
| MEAN                                        |  | 0.54454   | 0.87367 | 0.65774  |
| MAX.                                        |  | 1.00000   | 1.00000 | 0.94118  |
| INFECTED                                    |  |           |         |          |
|                                             |  | Precision | Recall  | F1 Score |
| MIN.                                        |  | 0.40909   | 0.31481 | 0.43038  |
| MEDIAN                                      |  | 0.94737   | 0.57143 | 0.70000  |
| MEAN                                        |  | 0.91497   | 0.57515 | 0.69572  |
| MAX.                                        |  | 1.00000   | 1.00000 | 0.93204  |
|                                             |  |           |         |          |
|                                             |  | dpi 15    |         |          |
| HEALTHY                                     |  |           |         |          |
|                                             |  | Precision | Recall  | F1 Score |
| MIN.                                        |  | 0.42553   | 0.73333 | 0.55556  |
| MEDIAN                                      |  | 0.83333   | 1.00000 | 0.90476  |
| MEAN                                        |  | 0.82073   | 0.96897 | 0.88204  |
| MAX.                                        |  | 1.00000   | 1.00000 | 1.00000  |
| INFECTED                                    |  |           |         |          |
|                                             |  | Precision | Recall  | F1 Score |
| MIN.                                        |  | 0.77778   | 0.58621 | 0.70588  |
| MEDIAN                                      |  | 1.00000   | 0.83333 | 0.88889  |
| MEAN                                        |  | 0.96467   | 0.81902 | 0.88095  |

|      |         |         |         |
|------|---------|---------|---------|
| MAX. | 1.00000 | 1.00000 | 1.00000 |
|------|---------|---------|---------|
