# Supplementary material for: Early Detection of Wild Rocket Tracheofusariosis Using Hyperspectral Image-Based Machine Learning
Source: MDPI journal article supplement (doi:10.3390/rs14010084), 2021-12-24
Supplement: s1 [file s1]

**Table S1.** Hyperspectral vegetative indices used in this work.

| Vegetation Index                                             | Formula                                                                               | Target                         | Reference |
|--------------------------------------------------------------|---------------------------------------------------------------------------------------|--------------------------------|-----------|
| AI (Anthocyanin Index)                                       | $\frac{R600 - R699}{R500 - R599}$                                                     | Anthocyan                      | [1]       |
| ARI (Anthocyanin Reflectance Index)                          | $\frac{1}{R550} - \frac{1}{R700}$                                                     | Carotenoids                    | [2]       |
| CAR (Carotenoid Index)                                       | $\frac{R515}{R570}$                                                                   | Carotenoids                    | [3]       |
| DVI Simple Ratio NIR/RED Difference Vegetation Index         | $R782 - R675$                                                                         | Plant vitality                 | [4]       |
| FWBI1 (Floating-Position Water Band Index 1)                 | $\frac{R900}{\min\{R930 \div 980\}}$                                                  | Water                          | [5]       |
| FWBI2 (Floating-Position Water Band Index 2)                 | $\frac{R920}{\min\{R960 \div 1000\}}$                                                 | Water                          | [5]       |
| GI1 (Greenness Index)                                        | $R550/R670$                                                                           | Plant vitality and chlorophyll | [6]       |
| GI2 (Greenness Index)                                        | $R539/R682$                                                                           | Plant vitality                 | [7]       |
| gNDVI (Green NDVI)                                           | $\frac{R750 - R550}{R750 + R550}$                                                     | Vegetation                     | [8]       |
| HNDVI (Hyperspectral NDVI)                                   | $\frac{R774 - R677}{R774 + R677}$                                                     | Vegetation                     | [9]       |
| HVI (Hyperspectral Vegetation Index)                         | $R743/R692$                                                                           | Plant vitality                 | [10]      |
| LI (Lomin Index)                                             | $\min\{R640 \div 680\}$                                                               | Chlorophyll                    | [11]      |
| LIC3 (Lichtenthaler Indices 3)                               | $R440/R740$                                                                           | Carotenoids                    | [12]      |
| LRDSI (Leaf Rust Disease Severity Index)                     | $6.9 \times \frac{R605}{R455} - 1.2$                                                  | Rust severity                  | [13]      |
| MCARI (Modified Chlorophyll Absorption in Reflectance Index) | $\frac{[(R712 - R682) - 0.2 \times (R712 - R539)]}{R682}$                             | Chlorophyll                    | [14]      |
| MCARI1 (Modified Chlorophyll Absorption Reflectance Index 1) | $1.2 \times [2.5 \times (R800 - R600) - 1.3 \times (R800 - R550)]$                    | Plant vitality and chlorophyll | [15]      |
| mNDVI705 (Modified NDVI705)                                  | $\frac{R750 - R705}{R750 + R705 - 2 \times R445}$                                     | Vegetation                     | [16]      |
| MSAVI (Modified Soil Adjusted Vegetation Index)              | $0.5 \times [2 \times R800 + 1 - 2\sqrt{2 \times R800 + 1 - 8 \times (R800 - R670)}]$ | Vegetation                     | [17]      |
| mSR705 (Modified Simple Ratio 705)                           | $\frac{R750 - R445}{R705 + R445}$                                                     | Vegetation                     | [18]      |
| NDVI (Normalized Difference Vegetation Index)                | $\frac{R670 - R800}{R670 + R800}$                                                     | Plant vitality and chlorophyll | [19]      |
| NDVI 705                                                     | $\frac{R750 - R705}{R750 + R705}$                                                     | Vegetation                     | [20]      |
| NPQI (Normalized Phaeophytinization Index)                   | $\frac{R415 - R435}{R415 + R435}$                                                     | Chlorophyll                    | [21]      |
| OSAVI (Optimized Soil Adjusted Vegetation Index)             | $\frac{(1.16) \times (R800 - R670)}{R800 + R670 + 0.16}$                              | Vegetation                     | [22]      |
| PRI (Photochemical Reflectance Index)                        | $\frac{R531 - R570}{R531 + R570}$                                                     | Photochemical activity         | [23]      |
| PRI515 (Photochemical Reflectance Index)                     | $\frac{R515 - R531}{R515 + R531}$                                                     | Carotenoids                    | [24]      |
| PRIn (Photochemical Reflectance Index normalized)            | $\frac{PRI}{RDVI} \times \frac{R700}{R670}$                                           | Carotenoids                    | [25]      |
| PSRI (Plant Senescence Reflectance Index)                    | $\frac{R678 - R500}{R750}$                                                            | Vegetation                     | [26]      |
| PSSRa (Pigment-Specific Simple Ratio a)                      | $R800/R680$                                                                           | Chlorophyll                    | [27]      |
| PSSRb (Pigment-Specific Simple Ratio b)                      | $R800/R635$                                                                           | Chlorophyll                    | [27]      |
| PSSRc (Pigment-Specific Simple Ratio)                        | $R800/R470$                                                                           | Carotenoid                     | [27]      |
| PVI (Perpendicular Vegetation Index)                         | $\frac{R800 - 0.2 \times R670 - 0.6}{1.019}$                                          | Vegetation                     | [28]      |

|                                                                  |                                                                                  |                                          |      |
|------------------------------------------------------------------|----------------------------------------------------------------------------------|------------------------------------------|------|
| <b>R705/(R717+R491)</b>                                          | $\frac{R705}{R717 + R491}$                                                       | Vegetation and chlorophyll               | [29] |
| <b>RARS</b> (Ratio Analysis of Reflectance Spectra)              | $\frac{R746}{R513}$                                                              | Carotenoids                              | [30] |
| <b>RDVI</b> (Renormalized Difference Vegetation Index)           | $\frac{R800 - R670}{(R800 + R670)^{0.5}}$                                        | Plant vitality and chlorophyll           | [31] |
| <b>RE-NDVI</b> (Red Edge NDVI)                                   | $\frac{R750 - R705}{R750 - R705}$                                                | Vegetation                               | [20] |
| <b>REP</b> (Red-Edge Position Linear Interpolation)              | $\frac{R700 + 40 \times \frac{R670 + R780}{2} - R700}{R740 - R700}$              | Red-edge position                        | [32] |
| <b>RGRcn</b> (Red Green Ratio Chlorophyll Content)               | $\frac{R612 + R660}{R510 + R560}$                                                | Chlorophyll                              | [33] |
| <b>RVI</b> (Ratio Vegetation Index)                              | $\frac{R493}{R678}$                                                              | Plant vitality                           | [34] |
| <b>RVSI</b> (Red-Edge Vegetation Stress Index)                   | $\frac{R800 - R670}{(R800 + R670) \times 0.5}$                                   | Plant vitality                           | [31] |
| <b>SAVI</b> (Soil Adjustment Vegetation Index)                   | $\frac{R782 - R675}{R782 + R675 + 0.2} \times 1.2$                               | Crop parameters                          | [35] |
| <b>SIPI</b> (Structure Intensive Pigment Index)                  | $\frac{R800 - R445}{R800 - R680}$                                                | Chlorophyll                              | [36] |
| <b>SRI</b> (Simple Ratio Index)                                  | $\frac{R800}{R680}$                                                              | Vegetation, Chlorophyll, Leaf area index | [37] |
| <b>SRPI</b> (Simple Ratio Pigment Index)                         | $\frac{R430}{R680}$                                                              | Chlorophyll                              | [38] |
| <b>TCARI</b> (Transformed Chlorophyll Absorbtion Ratio Index)    | $3 \times [(R700 - R670) - 0.2 \times (R700 - R550) \times (\frac{R700}{R670})]$ | Plant vitality and chlorophyll           | [39] |
| <b>TCARI/OSAVI</b>                                               |                                                                                  | Plant vitality and chlorophyll           | [39] |
| <b>TSAVI</b> (Trasformed Soil Adjustment Vegetation Index)       | $R782 - R675$                                                                    | Crop parameters                          | [35] |
| <b>TVI</b> (Triangular Vegetation Index)                         | $0.5 \times [120 \times (R750 - R550) - 200 \times (R670 - R550)]$               | Plant vitality and chlorophyll           | [40] |
| <b>VARIgreen</b> (Visible Atmospherically Resistant Index green) | $\frac{R_{green} - R_{red}}{R_{green} + R_{red} - R_{blue}}$                     | Vegetation                               | [41] |
| <b>VOG1</b> (Vogelmann Index1)                                   | $\frac{R740}{R720}$                                                              | Plant vitality and chlorophyll           | [42] |
| <b>VOG2</b> (Vogelmann Indices 2)                                | $\frac{R734 - R747}{R715 + R726}$                                                | Plant vitality and chlorophyll           | [42] |
| <b>VOG3</b> (Vogelmann Indices 3)                                | $\frac{R734 - R747}{R715 + R720}$                                                | Plant vitality and chlorophyll           | [42] |
| <b>WBI</b> (Water Band Index)                                    | $\frac{R950}{R900}$                                                              | Water Index                              | [43] |
| <b>WI</b> (Water Index)                                          | $\frac{R900}{R970}$                                                              | Water content                            | [44] |
| <b>ZTMI</b> (Zarco-Tejada-Miller Index)                          | $\frac{R750}{R710}$                                                              | Chlorophyll                              | [45] |

- [1] Gamon, J.A.; Surfus, J.S. Assessing leaf pigment content and activity with a reflectometer. *New Phytol.* **1999**, *143*, 105–117. doi: 10.1046/j.1469-8137.1999.00424.x
- [2] Gitelson, A.A.; Merzlyak, M.N.; Chivkunova, O.B. Optical properties and nondestructive estimation of anthocyanin content in plant leaves. *Photochem. Photobiol.* **2001**, *74*, 38. doi:10.1562/0031-8655(2001)074<0038:opaneo>2.0.co;2
- [3] Hernández-Clemente, R., Navarro-Cerrillo, R. M., and Zarco-Tejada, P. J. Carotenoid content estimation in a heterogeneous conifer forest using narrowband indices and PROSPECT+DART simulations. *Remote Sens. Environ.* **2012**, *127*, 298–315. doi: 10.1016/j.rse.2012.09.014
- [4] Tucker, C.J. Red and photographic infrared linear combinations for monitoring vegetation. *Remote Sens. Environ.* **1979**, *8*, 127–150. doi:10.1016/0034-4257(79)90013-0.
- [5] Harris, A.; Bryant, R.G.; Baird, A.J. Mapping the effects of water stress on Sphagnum: preliminary observations using airborne remote sensing. *Remote Sens. Environ.* **2006**, *100*, 363–378. doi: 10.1016/j.rse.2005.10.024

- [6] Smith, R.C.G.; Adams, J.; Stephens, D.J.; Hick, P.T. Forecasting wheat yield in a Mediterranean-type environment from the NOAA satellite. *Aus. J. Agric. Res.* **1995**, *46*, 113. doi:10.1071/ar9950113
- [7] Zarco-Tejada, P.J.; Berjón, A.; López-Lozano, R.; Miller, J.R.; Martín, P.; Cachorro, V.; González, M.R.; Frutos, A. Assessing vineyard condition with hyperspectral indices: Leaf and canopy reflectance simulation in a row-structured discontinuous canopy. *Remote Sens. Environ.* **2005**, *99*, 271–287. doi:10.1016/j.rse.2005.09.002
- [8] Buschmann, C.; Nagel, E. *In vivo* spectroscopy and internal optics of leaves as basis for remote sensing of vegetation. *Int. J. Remote Sens.* **1993**, *14*, 711–722. doi:10.1080/01431169308904370
- [9] Oppelt, N.; Monitoring of plant chlorophyll and nitrogen status using the airborne imaging spectrometer AVIS. Dissertation, Fakultät für Geowissenschaften, Ludwig-Maximilians-Universität, München 2002.
- [10] Gitelson, A.A.; Merzlyak, M.N.; Lichtenthaler, H.K. Detection of red edge position and chlorophyll content by reflectance measurements near 700 nm. *J. Plant Physiol.* **1996**, *148*, 501–508. doi:10.1016/s0176-1617(96)80285-9
- [11] Chen, B.; Wang, K.R.; Li, S.K.; Jin, X.L.; Chen, J.L.; Zhang, D.S. The effects of disease stress on spectra reflectance and chlorophyll fluorescence characteristics of cotton leaves. *J. Agr. Eng. Ers.* **2011**, *27*, 86–93. doi:10.3969/j.issn.1002-6819.2011.09.017
- [12] Lichtenthaler, H.K.; Gitelson, A.; Lang, M. Non-destructive determination of chlorophyll content of leaves of a green and an aurea mutant of tobacco by reflectance measurements. *J. Plant Physiol.* **1996**, *148*, 483–493.
- [13] Ashourloo, D.; Mobasher, M.R.; Huete, A. Developing two spectral disease indices for detection of wheat leaf rust (*Puccinia triticina*). *Remote Sens.* **2014**, *6*, 4723–40. <https://doi.org/10.3390/rs6064723>
- [14] Daughtry, C. Estimating corn leaf chlorophyll concentration from leaf and canopy reflectance. *Remote Sens. Environ.* **2000**, *74*, 229–239. doi:10.1016/s0034-4257(00)00113-9
- [15] Haboudane, D. Hyperspectral vegetation indices and novel algorithms for predicting green LAI of crop canopies: modeling and validation in the context of precision agriculture. *Remote Sens. Environ.* **2004**, *90*, 337–352. doi:10.1016/j.rse.2003.12.013.
- [16] Huete, A.R.; Liu, H.Q.; Batchily, K.; van Leeuwen, W. A comparison of vegetation indices over a global set of TM images for EOS-MODIS. *Remote Sens. Environ.* **1997**, *59*(3), 440–451. doi:10.1016/s0034-4257(96)00112-5
- [17] Qi, J.; Chehbouni, A.; Huete, A.R.; Kerr, Y. H.; Sorooshian, S. A modified soil adjusted vegetation index. *Remote Sens. Environ.* **1994**, *48*, 119–126. doi:10.1016/0034-4257(94)90134-1
- [18] Wu, C.; Niu, Z.; Tang, Q.; Huang, W. Estimating chlorophyll content from hyperspectral vegetation indices: modeling and validation. *Agric. For. Meteorol.* **2008**, *148*, 1230–1241. doi:10.1016/j.agrformet.2008.03.005
- [19] Rouse, J.; Haas, R.; Schell, J.; Deering, D. Monitoring vegetation systems in the Great Plains with ERTS. In Proceedings of the 3<sup>rd</sup> Earth Resources Technology Satellite-1 Symposium, Washington, DC, USA, December 10–14 1973.
- [20] Gitelson, A.; Merzlyak, M.N. Quantitative estimation of chlorophyll-a using reflectance spectra: experiments with Autumn chestnut and maple leaves. *J. Photochem. Photobiol. B.* **1994**, *22*, 247–252. doi:10.1016/1011-1344(93)06963-4
- [21] Barnes, J.D.; Balaguer, L.; Manrique, E.; Elvira, S.; Davison, A.W. A reappraisal of the use of DMSO for the extraction and determination of chlorophylls a and b in lichens and higher plants. *Environ. Exp. Bot.* **1992**, *32*, 85–100. doi:10.1016/0098-8472(92)90034-y
- [22] Rondeaux, G.; Steven, M.; Baret, F. Optimization of soil-adjusted vegetation indices. *Remote Sens. Environ.* **1996**, *55*, 95–107. doi:10.1016/0034-4257(95)00186-7
- [23] Gamon, J.A.; Penuelas, J.; Field, C.B. A narrow-waveband spectral index that tracks diurnal changes in photosynthetic efficiency. *Remote Sens. Environ.* **1992**, *41*(1), 35–44. [https://doi.org/10.1016/0034-4257\(92\)90059-S](https://doi.org/10.1016/0034-4257(92)90059-S)
- [24] Hernández-Clemente, R.; Navarro-Cerrillo, R. M.; Suárez, L.; Morales, F., and Zarco-Tejada, P. J. Assessing structural effects on PRI for stress detection in conifer forests. *Remote Sens. Environ.* **2011**, *115*, 2360–2375. doi:10.1016/j.rse.2011.04.036
- [25] Zarco-Tejada, P.J.; González-Dugo, V.; Williams, L.E.; Suárez, L.; Berni, J.A.J.; Goldhamer, D.; Fereres, E. A PRI-based water stress index combining structural and chlorophyll effects: Assessment using diurnal narrow-band airborne imagery and the CWSI thermal index. *Remote Sens. Environ.* **2013**, *138*, 38–50. <https://doi.org/10.1016/j.rse.2013.07.024>
- [26] Merzlyak, M.N.; Gitelson, A.A.; Chivkunova, O.B.; Rakitin, V.Y.U. Non-destructive optical detection of pigment changes during leaf senescence and fruit ripening. *Physiol. plant* **1999**, *106*(1), 135–141. <https://doi.org/10.1034/j.1399-3054.1999.106119.x>
- [27] Blackburn, G.A. Quantifying chlorophylls and carotenoids at leaf and canopy scales. *Remote Sens. Environ.* **1998**, *66*, 273–285. doi:10.1016/s0034-4257(98)00059-5

- [28] Wiegand, C.L.; Hatfield, J.L.; The Spectral-Agronomic Multisite-multicrop Analyses (SAMMA) Project, in Proc. 16th Cong., Int. Soc. Photogramm. and Remote Sens., Kyoto, Japan, 1-10 July 1988, *Int. Arch. Photogramm. Remote Sens.* **1988**, *27*, 696-706.
- [29] Tian, Y.C.; Yao, X.; Yang, J.; Cao, W.X.; Hannaway, D.B.; Zhu, Y. Assessing newly developed and published vegetation indices for estimating rice leaf nitrogen concentration with ground- and space-based hyperspectral reflectance. *Field Crops Res.* **2011**, *120*(2), 299–310. doi:10.1016/j.fcr.2010.11.002
- [30] Chappelle, E.W.; Kim, M.S.; McMurtrey, J.E. Ratio analysis of reflectance spectra (RARS): an algorithm for the remote estimation of the concentrations of chlorophyll a, chlorophyll b, and carotenoids in soybean leaves. *Remote Sens. Environ.* **1992**, *39*, 239–247. doi:10.1016/0034-4257(92)90089-3
- [31] Roujean, J.-L.; Breon, F.M. Estimating PAR absorbed by vegetation from bidirectional reflectance measurements. *Remote Sens. Environ.* **1995**, *51*, 375–384. doi:10.1016/0034-4257(94)00114-3
- [32] Guyot, G.; Baret, F.; Major, D.J. High spectral resolution: determination of spectral shifts between the red and the near infrared. Proceedings of ISPRS Congress, July 1988, Kyoto, Japan, **1998**, *11*, 740–760.
- [33] Steddom, K.; Heidel, G.; Jones, D.; Rush, C.M. Remote detection of rhizomania in sugar beets. *Phytopathology* **2003**, *93*, 720–726. doi: 10.1094/PHYTO.2003.93.6.720
- [34] Tilley, D.R.; Ahmed, M.; Son, J.H.; Badrinarayanan, H. Hyperspectral reflectance of emergent macrophytes as an indicator of water column ammonia in an oligohaline, subtropical marsh. *Ecol. Eng.* **2003**, *21*, 153–163. doi:10.1016/j.ecoleng.2003.10.004
- [35] Baret, F.; Guyot, G. Potentials and limits of vegetation indices for LAI and APAR assessment. *Remote Sens. Environ.* **1991**, *35*, 161–173. doi:10.1016/0034-4257(91)90009-u
- [36] Peñuelas, J.; Baret, F.; Filella, I. Semi-empirical indices to assess carotenoids/chlorophyll-a ratio from leaf spectral reflectance. *Photosynthetica* **1995**, *31*, 221-230.
- [37] Jordan, C.F. Derivation of Leaf-Area Index from quality of light on the forest floor. *Ecology* **1969**, *50*, 663–666. doi:10.2307/1936256
- [38] Peñuelas, J.; Gamon, J.A.; Fredeen, A.L.; Merino, J.; Field, C.B. Reflectance indices associated with physiological changes in nitrogen and water-limited sunflower leaves. *Remote Sens. Environ.* **1994**, *48*, 135–146. doi: 10.1016/0034-4257(94)90136-8
- [39] Haboudane, D.; Miller, J.R.; Tremblay, N.; Zarco-Tejada, P.J.; Dextraze, L. Integrated narrow-band vegetation indices for prediction of crop chlorophyll content for application to precision agriculture. *Remote Sens. Environ.* **2002**, *81*, 416–426. doi:10.1016/S0034-4257(02)00018-4
- [40] Broge, N.H.; Leblanc, E. Comparing prediction power and stability of broadband and hyperspectral vegetation indices for estimation of green leaf area index and canopy chlorophyll density. *Remote Sens. Environ.* **2001**, *76*, 156–172. doi:10.1016/S0034-4257(00)00197-8
- [41] Gitelson, A.A.; Kaufman, Y.J.; Stark, R.; Rundquist, D. Novel algorithms for remote estimation of vegetation fraction. *Remote Sens. Environ.* **2002**, *80*, 76–87. doi: 10.1016/S0034-4257(01)00289-9
- [42] Vogelmann, J.E.; Rock, B.N.; Moss, D.M. Red edge spectral measurements from sugar maple leaves. *Int. J. Remote Sens.* **1993**, *14*, 1563–1575. doi:10.1080/01431169308953986
- [43] Peñuelas J.; Gamon, J.A.; Griffin, K.L.; Field, C.B. Assessing community type, plant biomass, pigment composition, and photosynthetic efficiency of aquatic vegetation from spectral reflectance. *Remote Sens. Environ.* **1993**, *46*(2), 110–118. doi:10.1016/0034-4257(93)90088-f
- [44] Peñuelas, J.; Pinol, J.; Ogaya, R.; Filella, I. Estimation of plant water concentration by the reflectance Water Index WI (R900/R970). *Int. J. Remote Sens.* **1997**, *18*, 2869–2875. doi:10.1080/014311697217396
- [45] Zarco-Tejada, P.J.; Miller, J.R.; Noland, T.L.; Mohammed, G.H.; Sampson, P.H. Scaling-up and model inversion methods with narrowband optical indices for chlorophyll content estimation in closed forest canopies with hyperspectral data. *IEEE Trans. Geosci. Remote Sens.* **2001**, *39*, 1491–1507. DOI: 10.1109/36.934080
